# Supplementary material for: DNA barcodes for Aotearoa New Zealand Pyraloidea (Lepidoptera)
Source: Biodivers Data J. 2020 Nov 27;8:e58841. doi: 10.3897/BDJ.8.e58841 (PMC7718215; doi:10.3897/BDJ.8.e58841)
Supplement: Supplementary material 1 — Species list. [file bdj-08-e58841-s001.xlsx]

## Sheet: cluster_sequence-1
Cluster Sequences (RESL) Analysis
OTU	Process ID	Sampleid	Mean	Max	Subfamily	Taxon	Site	BIN	Count	NN Dist
OTU-1	NZPYR002-20	MTD 6507	0.8548468	2.8985507	Scopariinae	Eudonia submarginalis	Taranaki Dollys Farm	BOLD:ACP5949	64	2.6272578
OTU-1	NZPYR003-20	MTD 6508	0.8548468	2.8985507	Scopariinae	Eudonia submarginalis	Taranaki Dollys Farm	BOLD:ACP5949	64	2.6272578
OTU-1	NZPYR005-20	MTD 6510	0.8548468	2.8985507	Scopariinae	Eudonia submarginalis	Karamea	BOLD:ACP5949	64	2.6272578
OTU-1	NZPYR006-20	MTD 6511	0.8548468	2.8985507	Scopariinae	Eudonia submarginalis	Nelson	BOLD:ACP5949	64	2.6272578
OTU-1	NZPYR008-20	MTD 6513	0.8548468	2.8985507	Scopariinae	Eudonia submarginalis	Nelson	BOLD:ACP5949	64	2.6272578
OTU-1	NZPYR009-20	MTD 6514	0.8548468	2.8985507	Scopariinae	Eudonia submarginalis	Karamea	BOLD:ACP5949	64	2.6272578
OTU-1	NZPYR010-20	MTD 6515	0.8548468	2.8985507	Scopariinae	Eudonia submarginalis	Methven	BOLD:ACP5949	64	2.6272578
OTU-1	NZPYR011-20	MTD 6516	0.8548468	2.8985507	Scopariinae	Eudonia submarginalis	Nelson	BOLD:ACP5949	64	2.6272578
OTU-1	NZPYR012-20	MTD 6517	0.8548468	2.8985507	Scopariinae	Eudonia submarginalis	Karamea	BOLD:ACP5949	64	2.6272578
OTU-1	NZPYR013-20	MTD 6518	0.8548468	2.8985507	Scopariinae	Eudonia submarginalis	Nelson	BOLD:ACP5949	64	2.6272578
OTU-1	NZPYR016-20	MTD 6521	0.8548468	2.8985507	Scopariinae	Eudonia submarginalis	Karamea	BOLD:ACP5949	64	2.6272578
OTU-1	NZPYR017-20	MTD 6522	0.8548468	2.8985507	Scopariinae	Eudonia submarginalis	Taranaki Hollard Garden	BOLD:ACP5949	64	2.6272578
OTU-1	NZPYR018-20	MTD 6523	0.8548468	2.8985507	Scopariinae	Eudonia submarginalis	Karamea	BOLD:ACP5949	64	2.6272578
OTU-1	NZPYR037-20	MTD 6544	0.8548468	2.8985507	Scopariinae	Eudonia submarginalis	Methven	BOLD:ACP5949	64	2.6272578
OTU-1	NZPYR046-20	MTD 6553	0.8548468	2.8985507	Scopariinae	Eudonia submarginalis	Taranaki Dollys Farm	BOLD:ACP5949	64	2.6272578
OTU-1	NZPYR049-20	MTD 6556	0.8548468	2.8985507	Scopariinae	Eudonia submarginalis	Karamea	BOLD:ACP5949	64	2.6272578
OTU-1	NZPYR050-20	MTD 6557	0.8548468	2.8985507	Scopariinae	Eudonia submarginalis	Mount Hutt	BOLD:ACP5949	64	2.6272578
OTU-1	NZPYR056-20	MTD 6563	0.8548468	2.8985507	Scopariinae	Eudonia submarginalis	Karamea	BOLD:ACP5949	64	2.6272578
OTU-1	NZPYR057-20	MTD 6564	0.8548468	2.8985507	Scopariinae	Eudonia submarginalis	Karamea	BOLD:ACP5949	64	2.6272578
OTU-1	NZPYR061-20	MTD 6568	0.8548468	2.8985507	Scopariinae	Eudonia submarginalis	Taranaki Dollys Farm	BOLD:ACP5949	64	2.6272578
OTU-1	NZPYR083-20	MTD 6591	0.8548468	2.8985507	Scopariinae	Eudonia submarginalis	Karamea	BOLD:ACP5949	64	2.6272578
OTU-1	NZPYR087-20	MTD 6595	0.8548468	2.8985507	Scopariinae	Eudonia submarginalis	Methven	BOLD:ACP5949	64	2.6272578
OTU-1	NZPYR090-20	MTD 6598	0.8548468	2.8985507	Scopariinae	Eudonia submarginalis	Taranaki Hollard Garden	BOLD:ACP5949	64	2.6272578
OTU-1	NZPYR115-20	MTD 6623	0.8548468	2.8985507	Scopariinae	Eudonia submarginalis	Methven	BOLD:ACP5949	64	2.6272578
OTU-1	NZPYR116-20	MTD 6624	0.8548468	2.8985507	Scopariinae	Eudonia submarginalis	Nelson	BOLD:ACP5949	64	2.6272578
OTU-1	NZPYR134-20	MTD 6642	0.8548468	2.8985507	Scopariinae	Eudonia submarginalis	Karamea	BOLD:ACP5949	64	2.6272578
OTU-1	NZPYR137-20	MTD 6645	0.8548468	2.8985507	Scopariinae	Eudonia submarginalis	Nelson	BOLD:ACP5949	64	2.6272578
OTU-1	NZPYR151-20	MTD 6662	0.8548468	2.8985507	Scopariinae	Eudonia submarginalis	Methven	BOLD:ACP5949	64	2.6272578
OTU-1	NZPYR152-20	MTD 6663	0.8548468	2.8985507	Scopariinae	Eudonia submarginalis	Methven	BOLD:ACP5949	64	2.6272578
OTU-1	NZPYR154-20	MTD 6666	0.8548468	2.8985507	Scopariinae	Eudonia submarginalis	Te Wairoa Reserve	BOLD:ACP5949	64	2.6272578
OTU-1	NZPYR219-20	MTD 7442	0.8548468	2.8985507	Scopariinae	Eudonia submarginalis	Cambrians	BOLD:ACP5949	64	2.6272578
OTU-1	NZPYR220-20	MTD 7443	0.8548468	2.8985507	Scopariinae	Eudonia submarginalis	Cambrians	BOLD:ACP5949	64	2.6272578
OTU-1	NZPYR221-20	MTD 7444	0.8548468	2.8985507	Scopariinae	Eudonia submarginalis	Cambrians	BOLD:ACP5949	64	2.6272578
OTU-1	NZPYR222-20	MTD 7445	0.8548468	2.8985507	Scopariinae	Eudonia submarginalis	Cambrians	BOLD:ACP5949	64	2.6272578
OTU-1	NZPYR223-20	MTD 7446	0.8548468	2.8985507	Scopariinae	Eudonia submarginalis	Cambrians	BOLD:ACP5949	64	2.6272578
OTU-1	NZPYR224-20	MTD 7447	0.8548468	2.8985507	Scopariinae	Eudonia submarginalis	Methven	BOLD:ACP5949	64	2.6272578
OTU-1	NZPYR225-20	MTD 7448	0.8548468	2.8985507	Scopariinae	Eudonia submarginalis	Cambrians	BOLD:ACP5949	64	2.6272578
OTU-1	NZPYR226-20	MTD 7449	0.8548468	2.8985507	Scopariinae	Eudonia submarginalis	Cambrians	BOLD:ACP5949	64	2.6272578
OTU-1	NZPYR228-20	MTD 7451	0.8548468	2.8985507	Scopariinae	Eudonia submarginalis	Cambrians	BOLD:ACP5949	64	2.6272578
OTU-1	NZPYR229-20	MTD 7452	0.8548468	2.8985507	Scopariinae	Eudonia submarginalis	Cambrians	BOLD:ACP5949	64	2.6272578
OTU-1	NZPYR230-20	MTD 7453	0.8548468	2.8985507	Scopariinae	Eudonia submarginalis	Cambrians	BOLD:ACP5949	64	2.6272578
OTU-1	NZPYR231-20	MTD 7454	0.8548468	2.8985507	Scopariinae	Eudonia submarginalis	Methven	BOLD:ACP5949	64	2.6272578
OTU-1	NZPYR236-20	MTD 7459	0.8548468	2.8985507	Scopariinae	Eudonia submarginalis	Cambrians	BOLD:ACP5949	64	2.6272578
OTU-1	NZPYR237-20	MTD 7460	0.8548468	2.8985507	Scopariinae	Eudonia submarginalis	Cambrians	BOLD:ACP5949	64	2.6272578
OTU-1	NZPYR241-20	MTD 7464	0.8548468	2.8985507	Scopariinae	Eudonia submarginalis	Lawrence Gabriels Gully	BOLD:ACP5949	64	2.6272578
OTU-1	NZPYR257-20	MTD 7483	0.8548468	2.8985507	Scopariinae	Eudonia submarginalis	Methven	BOLD:ACP5949	64	2.6272578
OTU-1	NZPYR258-20	MTD 7484	0.8548468	2.8985507	Scopariinae	Eudonia submarginalis	Methven	BOLD:ACP5949	64	2.6272578
OTU-1	NZPYR260-20	MTD 7486	0.8548468	2.8985507	Scopariinae	Eudonia submarginalis	Cambrians	BOLD:ACP5949	64	2.6272578
OTU-1	NZPYR261-20	MTD 7487	0.8548468	2.8985507	Scopariinae	Eudonia submarginalis	Cambrians	BOLD:ACP5949	64	2.6272578
OTU-1	NZPYR262-20	MTD 7488	0.8548468	2.8985507	Scopariinae	Eudonia submarginalis	Cambrians	BOLD:ACP5949	64	2.6272578
OTU-1	NZPYR263-20	MTD 7489	0.8548468	2.8985507	Scopariinae	Eudonia submarginalis	Methven	BOLD:ACP5949	64	2.6272578
OTU-1	NZPYR377-20	MTD 7603	0.8548468	2.8985507	Scopariinae	Eudonia submarginalis	Cambrians	BOLD:ACP5949	64	2.6272578
OTU-1	NZPYR378-20	MTD 7604	0.8548468	2.8985507	Scopariinae	Eudonia submarginalis	Methven	BOLD:ACP5949	64	2.6272578
OTU-1	NZPYR379-20	MTD 7605	0.8548468	2.8985507	Scopariinae	Eudonia submarginalis	Methven	BOLD:ACP5949	64	2.6272578
OTU-1	NZPYR382-20	MTD 7608	0.8548468	2.8985507	Scopariinae	Eudonia submarginalis	Cambrians	BOLD:ACP5949	64	2.6272578
OTU-1	NZPYR383-20	MTD 7609	0.8548468	2.8985507	Scopariinae	Eudonia submarginalis	Methven	BOLD:ACP5949	64	2.6272578
OTU-1	NZPYR384-20	MTD 7610	0.8548468	2.8985507	Scopariinae	Eudonia submarginalis	Methven	BOLD:ACP5949	64	2.6272578
OTU-1	NZPYR386-20	MTD 7612	0.8548468	2.8985507	Scopariinae	Eudonia submarginalis	Lawrence	BOLD:ACP5949	64	2.6272578
OTU-1	NZPYR387-20	MTD 7613	0.8548468	2.8985507	Scopariinae	Eudonia submarginalis	Cambrians	BOLD:ACP5949	64	2.6272578
OTU-1	NZPYR388-20	MTD 7614	0.8548468	2.8985507	Scopariinae	Eudonia submarginalis	Cambrians	BOLD:ACP5949	64	2.6272578
OTU-1	NZPYR389-20	MTD 7615	0.8548468	2.8985507	Scopariinae	Eudonia submarginalis	Lawrence Steep Street	BOLD:ACP5949	64	2.6272578
OTU-1	NZPYR392-20	MTD 7618	0.8548468	2.8985507	Scopariinae	Eudonia submarginalis	Methven	BOLD:ACP5949	64	2.6272578
OTU-1	NZPYR393-20	MTD 7619	0.8548468	2.8985507	Scopariinae	Eudonia submarginalis	Lawrence Steep Street	BOLD:ACP5949	64	2.6272578
OTU-1	NZPYR404-20	MTD 7630	0.8548468	2.8985507	Scopariinae	Eudonia submarginalis	Cambrians	BOLD:ACP5949	64	2.6272578
OTU-2	NZPYR004-20	MTD 6509	0.1650165	0.1650165	Scopariinae	Eudonia colpota	Karamea	BOLD:ACX2095	2	4.784689
OTU-2	NZPYR089-20	MTD 6597	0.1650165	0.1650165	Scopariinae	Eudonia colpota	Karamea	BOLD:ACX2095	2	4.784689
OTU-3	NZPYR014-20	MTD 6519	0	0	Scopariinae	Eudonia philetaera	Nelson	BOLD:AEB7952	1	5.7471266
OTU-4	NZPYR019-20	MTD 6524	0.47686166	1.6025642	Scopariinae	Eudonia sabulosella	Mt. Potts	BOLD:ADP0315	23	4.6251993
OTU-4	NZPYR020-20	MTD 6526	0.47686166	1.6025642	Scopariinae	Eudonia sabulosella	Nelson	BOLD:ADP0315	23	4.6251993
OTU-4	NZPYR021-20	MTD 6527	0.47686166	1.6025642	Scopariinae	Eudonia sabulosella	Taranaki Dollys Farm	BOLD:ADP0315	23	4.6251993
OTU-4	NZPYR022-20	MTD 6528	0.47686166	1.6025642	Scopariinae	Eudonia sabulosella	Methven	BOLD:ADP0315	23	4.6251993
OTU-4	NZPYR032-20	MTD 6538	0.47686166	1.6025642	Scopariinae	Eudonia sabulosella	Methven	BOLD:ADP0315	23	4.6251993
OTU-4	NZPYR033-20	MTD 6540	0.47686166	1.6025642	Scopariinae	Eudonia sabulosella	Methven	BOLD:ADP0315	23	4.6251993
OTU-4	NZPYR034-20	MTD 6541	0.47686166	1.6025642	Scopariinae	Eudonia sabulosella	Taranaki Dollys Farm	BOLD:ADP0315	23	4.6251993
OTU-4	NZPYR041-20	MTD 6548	0.47686166	1.6025642	Scopariinae	Eudonia sabulosella	Nelson	BOLD:ADP0315	23	4.6251993
OTU-4	NZPYR042-20	MTD 6549	0.47686166	1.6025642	Scopariinae	Eudonia sabulosella	Taranaki Dollys Farm	BOLD:ADP0315	23	4.6251993
OTU-4	NZPYR043-20	MTD 6550	0.47686166	1.6025642	Scopariinae	Eudonia sabulosella	Taranaki Dollys Farm	BOLD:ADP0315	23	4.6251993
OTU-4	NZPYR044-20	MTD 6551	0.47686166	1.6025642	Scopariinae	Eudonia sabulosella	Methven	BOLD:ADP0315	23	4.6251993
OTU-4	NZPYR051-20	MTD 6558	0.47686166	1.6025642	Scopariinae	Eudonia sabulosella	Methven	BOLD:ADP0315	23	4.6251993
OTU-4	NZPYR054-20	MTD 6561	0.47686166	1.6025642	Scopariinae	Eudonia sabulosella	Taranaki Dollys Farm	BOLD:ADP0315	23	4.6251993
OTU-4	NZPYR080-20	MTD 6587	0.47686166	1.6025642	Scopariinae	Eudonia sabulosella	Methven	BOLD:ADP0315	23	4.6251993
OTU-4	NZPYR086-20	MTD 6594	0.47686166	1.6025642	Scopariinae	Eudonia sabulosella	Taranaki Dollys Farm	BOLD:ADP0315	23	4.6251993
OTU-4	NZPYR142-20	MTD 6650	0.47686166	1.6025642	Scopariinae	Eudonia sabulosella	Nelson	BOLD:ADP0315	23	4.6251993
OTU-4	NZPYR149-20	MTD 6659	0.47686166	1.6025642	Scopariinae	Eudonia sabulosella	Methven	BOLD:ADP0315	23	4.6251993
OTU-4	NZPYR252-20	MTD 7478	0.47686166	1.6025642	Scopariinae	Eudonia sabulosella	Methven	BOLD:ADP0315	23	4.6251993
OTU-4	NZPYR253-20	MTD 7479	0.47686166	1.6025642	Scopariinae	Eudonia sabulosella	Cambrians	BOLD:ADP0315	23	4.6251993
OTU-4	NZPYR269-20	MTD 7495	0.47686166	1.6025642	Scopariinae	Eudonia sabulosella	Cambrians	BOLD:ADP0315	23	4.6251993
OTU-4	NZPYR270-20	MTD 7496	0.47686166	1.6025642	Scopariinae	Eudonia sabulosella	Cambrians	BOLD:ADP0315	23	4.6251993
OTU-4	NZPYR419-20	MTD 7845	0.47686166	1.6025642	Scopariinae	Eudonia sabulosella	Taranaki Dollys Farm	BOLD:ADP0315	23	4.6251993
OTU-4	NZPYR425-20	MTD 7851	0.47686166	1.6025642	Scopariinae	Eudonia sabulosella	Lake Roundabout	BOLD:ADP0315	23	4.6251993
OTU-5	NZPYR023-20	MTD 6529	0.10673537	0.32051283	Scopariinae	Eudonia philerga	Karamea	BOLD:ACX3161	6	4.784689
OTU-5	NZPYR294-20	MTD 7520	0.10673537	0.32051283	Scopariinae	Eudonia philerga	Lawrence Gabriels Gully	BOLD:ACX3161	6	4.784689
OTU-5	NZPYR295-20	MTD 7521	0.10673537	0.32051283	Scopariinae	Eudonia philerga	Waikawa	BOLD:ACX3161	6	4.784689
OTU-5	NZPYR411-20	MTD 7637	0.10673537	0.32051283	Scopariinae	Eudonia philerga	Nelson	BOLD:ACX3161	6	4.784689
OTU-5	NZPYR412-20	MTD 7638	0.10673537	0.32051283	Scopariinae	Eudonia philerga	Te Wairoa Reserve	BOLD:ACX3161	6	4.784689
OTU-5	NZPYR413-20	MTD 7639	0.10673537	0.32051283	Scopariinae	Eudonia philerga	Nelson	BOLD:ACX3161	6	4.784689
OTU-6	NZPYR024-20	MTD 6530	0.7742148	1.1844331	Scopariinae	Eudonia dinodes	Karamea	BOLD:ADY7798	3	6.333333
OTU-6	NZPYR081-20	MTD 6588	0.7742148	1.1844331	Scopariinae	Eudonia dinodes	Nelson	BOLD:ADY7798	3	6.333333
OTU-6	NZPYR431-20	MTD 7857	0.7742148	1.1844331	Scopariinae	Eudonia dinodes	Karamea	BOLD:ADY7798	3	6.333333
OTU-7	NZPYR026-20	MTD 6532	0.5624827	1.1551155	Scopariinae	Eudonia rakaiensis	Nelson	BOLD:AEB9619	11	4.3269234
OTU-7	NZPYR027-20	MTD 6533	0.5624827	1.1551155	Scopariinae	Eudonia rakaiensis	Nelson	BOLD:AEB9619	11	4.3269234
OTU-7	NZPYR085-20	MTD 6593	0.5624827	1.1551155	Scopariinae	Eudonia rakaiensis	Karamea	BOLD:AEB9619	11	4.3269234
OTU-7	NZPYR114-20	MTD 6622	0.5624827	1.1551155	Scopariinae	Eudonia rakaiensis	Nelson	BOLD:AEB9619	11	4.3269234
OTU-7	NZPYR248-20	MTD 7474	0.5624827	1.1551155	Scopariinae	Eudonia rakaiensis	Cambrians	BOLD:AEB9619	11	4.3269234
OTU-7	NZPYR255-20	MTD 7481	0.5624827	1.1551155	Scopariinae	Eudonia rakaiensis	Cambrians	BOLD:AEB9619	11	4.3269234
OTU-7	NZPYR381-20	MTD 7607	0.5624827	1.1551155	Scopariinae	Eudonia rakaiensis	Cambrians	BOLD:AEB9619	11	4.3269234
OTU-7	NZPYR385-20	MTD 7611	0.5624827	1.1551155	Scopariinae	Eudonia rakaiensis	Cambrians	BOLD:AEB9619	11	4.3269234
OTU-7	NZPYR395-20	MTD 7621	0.5624827	1.1551155	Scopariinae	Eudonia rakaiensis	Lawrence	BOLD:AEB9619	11	4.3269234
OTU-7	NZPYR421-20	MTD 7847	0.5624827	1.1551155	Scopariinae	Eudonia rakaiensis	Methven	BOLD:AEB9619	11	4.3269234
OTU-7	NZPYR438-20	MTD 7864	0.5624827	1.1551155	Scopariinae	Eudonia rakaiensis	Nelson	BOLD:AEB9619	11	4.3269234
OTU-8	NZPYR029-20	MTD 6535	0.18319377	0.3236246	Scopariinae	Scoparia halopis	Taranaki Hollard Garden	BOLD:ACA4398	7	2.310231
OTU-8	NZPYR031-20	MTD 6537	0.18319377	0.3236246	Scopariinae	Scoparia halopis	Karamea	BOLD:ACA4398	7	2.310231
OTU-8	NZPYR113-20	MTD 6621	0.18319377	0.3236246	Scopariinae	Scoparia halopis	Nelson	BOLD:ACA4398	7	2.310231
OTU-8	NZPYR146-20	MTD 6654	0.18319377	0.3236246	Scopariinae	Scoparia halopis	Nelson	BOLD:ACA4398	7	2.310231
OTU-8	NZPYR247-20	MTD 7473	0.18319377	0.3236246	Scopariinae	Scoparia halopis	Lawrence	BOLD:ACA4398	7	2.310231
OTU-8	NZPYR259-20	MTD 7485	0.18319377	0.3236246	Scopariinae	Scoparia halopis	Lawrence Gabriels Gully	BOLD:ACA4398	7	2.310231
OTU-8	NZPYR390-20	MTD 7616	0.18319377	0.3236246	Scopariinae	Scoparia halopis	Lawrence Gabriels Gully	BOLD:ACA4398	7	2.310231
OTU-9	NZPYR030-20	MTD 6536	0.68484026	1.6501651	Scopariinae	Eudonia cymatias	Karamea	BOLD:ACP5784	13	4.6251993
OTU-9	NZPYR060-20	MTD 6567	0.68484026	1.6501651	Scopariinae	Eudonia cymatias	Nelson	BOLD:ACP5784	13	4.6251993
OTU-9	NZPYR112-20	MTD 6620	0.68484026	1.6501651	Scopariinae	Eudonia cymatias	Nelson	BOLD:ACP5784	13	4.6251993
OTU-9	NZPYR246-20	MTD 7471	0.68484026	1.6501651	Scopariinae	Eudonia cymatias	Waikawa	BOLD:ACP5784	13	4.6251993
OTU-9	NZPYR296-20	MTD 7522	0.68484026	1.6501651	Scopariinae	Eudonia cymatias	Lawrence Steep Street	BOLD:ACP5784	13	4.6251993
OTU-9	NZPYR297-20	MTD 7523	0.68484026	1.6501651	Scopariinae	Eudonia cymatias	Lawrence Gabriels Gully	BOLD:ACP5784	13	4.6251993
OTU-9	NZPYR298-20	MTD 7524	0.68484026	1.6501651	Scopariinae	Eudonia cymatias	Lawrence Gabriels Gully	BOLD:ACP5784	13	4.6251993
OTU-9	NZPYR375-20	MTD 7601	0.68484026	1.6501651	Scopariinae	Eudonia cymatias	Lawrence Steep Street	BOLD:ACP5784	13	4.6251993
OTU-9	NZPYR376-20	MTD 7602	0.68484026	1.6501651	Scopariinae	Eudonia cymatias	Lawrence Gabriels Gully	BOLD:ACP5784	13	4.6251993
OTU-9	NZPYR394-20	MTD 7620	0.68484026	1.6501651	Scopariinae	Eudonia cymatias	Lawrence Steep Street	BOLD:ACP5784	13	4.6251993
OTU-9	NZPYR396-20	MTD 7622	0.68484026	1.6501651	Scopariinae	Eudonia cymatias	Waikawa	BOLD:ACP5784	13	4.6251993
OTU-9	NZPYR405-20	MTD 7631	0.68484026	1.6501651	Scopariinae	Eudonia cymatias	Lawrence	BOLD:ACP5784	13	4.6251993
OTU-9	NZPYR416-20	MTD 7842	0.68484026	1.6501651	Scopariinae	Eudonia cymatias	Lawrence Gabriels Gully	BOLD:ACP5784	13	4.6251993
OTU-10	NZPYR035-20	MTD 6542	0.0	0.0	Scopariinae	Scoparia animosa	Taranaki Hollard Garden	BOLD:ADY7195	2	5.263158
OTU-10	NZPYR036-20	MTD 6543	0.0	0.0	Scopariinae	Scoparia animosa	Nelson	BOLD:ADY7195	2	5.263158
OTU-11	NZPYR038-20	MTD 6545	0.43098083	0.6472492	Scopariinae	Eudonia dochmia	Taranaki Hollard Garden	BOLD:AEB9719	3	4.8076925
OTU-11	NZPYR053-20	MTD 6560	0.43098083	0.6472492	Scopariinae	Eudonia dochmia	Taranaki Hollard Garden	BOLD:AEB9719	3	4.8076925
OTU-11	NZPYR153-20	MTD 6665	0.43098083	0.6472492	Scopariinae	Eudonia dochmia	Nelson	BOLD:AEB9719	3	4.8076925
OTU-12	NZPYR039-20	MTD 6546	0.58296216	1.0582011	Scopariinae	Eudonia octophora	Karamea	BOLD:ACP5967	7	4.5
OTU-12	NZPYR088-20	MTD 6596	0.58296216	1.0582011	Scopariinae	Eudonia octophora	Karamea	BOLD:ACP5967	7	4.5
OTU-12	NZPYR138-20	MTD 6646	0.58296216	1.0582011	Scopariinae	Eudonia octophora	Nelson	BOLD:ACP5967	7	4.5
OTU-12	NZPYR240-20	MTD 7463	0.58296216	1.0582011	Scopariinae	Eudonia octophora	Waikawa	BOLD:ACP5967	7	4.5
OTU-12	NZPYR264-20	MTD 7490	0.58296216	1.0582011	Scopariinae	Eudonia octophora	Waikawa	BOLD:ACP5967	7	4.5
OTU-12	NZPYR400-20	MTD 7626	0.58296216	1.0582011	Scopariinae	Eudonia octophora	Waikawa	BOLD:ACP5967	7	4.5
OTU-12	NZPYR423-20	MTD 7849	0.58296216	1.0582011	Scopariinae	Eudonia octophora	Waikawa	BOLD:ACP5967	7	4.5
OTU-13	NZPYR040-20	MTD 6547	0.19379441	0.330033	Scopariinae	Eudonia minualis	Te Wairoa Reserve	BOLD:ADY9411	6	4.920635
OTU-13	NZPYR281-20	MTD 7507	0.19379441	0.330033	Scopariinae	Eudonia minualis	Cambrians Reserve	BOLD:ADY9411	6	4.920635
OTU-13	NZPYR286-20	MTD 7512	0.19379441	0.330033	Scopariinae	Eudonia minualis	Lawrence Gabriels Gully	BOLD:ADY9411	6	4.920635
OTU-13	NZPYR287-20	MTD 7513	0.19379441	0.330033	Scopariinae	Eudonia minualis	Lawrence Steep Street	BOLD:ADY9411	6	4.920635
OTU-13	NZPYR291-20	MTD 7517	0.19379441	0.330033	Scopariinae	Eudonia minualis	Lawrence Gabriels Gully	BOLD:ADY9411	6	4.920635
OTU-13	NZPYR292-20	MTD 7518	0.19379441	0.330033	Scopariinae	Eudonia minualis	Lawrence Gabriels Gully	BOLD:ADY9411	6	4.920635
OTU-14	NZPYR045-20	MTD 6552	0	0	Scopariinae	Eudonia axena	Methven	BOLD:AEB9883	1	2.6272578
OTU-15	NZPYR047-20	MTD 6554	0	0	Scopariinae	Eudonia manganeutis	Methven	BOLD:AEB7627	1	5.1282053
OTU-16	NZPYR052-20	MTD 6559	1.05667	1.4423077	Scopariinae	Scoparia s.l. sp. A	Taranaki Hollard Garden	BOLD:AEB7869	4	6.0897436
OTU-16	NZPYR271-20	MTD 7497	1.05667	1.4423077	Scopariinae	Scoparia s.l. sp. A	Lawrence Steep Street	BOLD:AEB7869	4	6.0897436
OTU-16	NZPYR272-20	MTD 7498	1.05667	1.4423077	Scopariinae	Scoparia s.l. sp. A	Lawrence Steep Street	BOLD:AEB7869	4	6.0897436
OTU-16	NZPYR288-20	MTD 7514	1.05667	1.4423077	Scopariinae	Scoparia s.l. sp. A	Lawrence Steep Street	BOLD:AEB7869	4	6.0897436
OTU-17	NZPYR048-20	MTD 6555	0	0	Scopariinae	Scoparia autumna	Karamea	BOLD:ADY6961	1	2.310231
OTU-18	NZPYR063-20	MTD 6570	0.6941945	1.9900497	Crambinae	Orocrambus vulgaris	Mt. Potts	BOLD:AEC1068	13	2.8052804
OTU-18	NZPYR064-20	MTD 6571	0.6941945	1.9900497	Crambinae	Orocrambus vulgaris	Mt. Potts	BOLD:AEC1068	13	2.8052804
OTU-18	NZPYR066-20	MTD 6573	0.6941945	1.9900497	Crambinae	Orocrambus vulgaris	Mt. Potts	BOLD:AEC1068	13	2.8052804
OTU-18	NZPYR067-20	MTD 6574	0.6941945	1.9900497	Crambinae	Orocrambus vulgaris	Mt. Potts	BOLD:AEC1068	13	2.8052804
OTU-18	NZPYR068-20	MTD 6575	0.6941945	1.9900497	Crambinae	Orocrambus vulgaris	Burkes Pass	BOLD:AEC1068	13	2.8052804
OTU-18	NZPYR070-20	MTD 6577	0.6941945	1.9900497	Crambinae	Orocrambus vulgaris	Mt. Potts	BOLD:AEC1068	13	2.8052804
OTU-18	NZPYR071-20	MTD 6578	0.6941945	1.9900497	Crambinae	Orocrambus vulgaris	Mt. Potts	BOLD:AEC1068	13	2.8052804
OTU-18	NZPYR101-20	MTD 6609	0.6941945	1.9900497	Crambinae	Orocrambus vulgaris	Mt. Potts	BOLD:AEC1068	13	2.8052804
OTU-18	NZPYR133-20	MTD 6641	0.6941945	1.9900497	Crambinae	Orocrambus vulgaris	Mt. Potts	BOLD:AEC1068	13	2.8052804
OTU-18	NZPYR145-20	MTD 6653	0.6941945	1.9900497	Crambinae	Orocrambus vulgaris	Mt. Potts	BOLD:AEC1068	13	2.8052804
OTU-18	NZPYR201-20	MTD 6713	0.6941945	1.9900497	Crambinae	Orocrambus vulgaris	Mt. Potts	BOLD:AEC1068	13	2.8052804
OTU-18	NZPYR202-20	MTD 6714	0.6941945	1.9900497	Crambinae	Orocrambus vulgaris	Burkes Pass	BOLD:AEC1068	13	2.8052804
OTU-18	NZPYR207-20	MTD 6719	0.6941945	1.9900497	Crambinae	Orocrambus vulgaris	Burkes Pass	BOLD:AEC1068	13	2.8052804
OTU-19	NZPYR065-20	MTD 6572	0	0	Crambinae	Orocrambus vitellus	Mt. Potts	BOLD:ACP6432	1	2.3333333
OTU-20	NZPYR074-20	MTD 6581	0	0	Crambinae	Orocrambus apicellus	Karamea	BOLD:AEC0423	1	3.5650623
OTU-21	NZPYR073-20	MTD 6580	0	0	Crambinae	Orocrambus vulgaris	Mt. Potts	BOLD:AEC1070	1	2.8052804
OTU-22	NZPYR079-20	MTD 6586	0.42505252	0.6379585	Scopariinae	Eudonia diphtheralis	Nelson	BOLD:ACI5948	3	2.724359
OTU-22	NZPYR244-20	MTD 7469	0.42505252	0.6379585	Scopariinae	Eudonia diphtheralis	Danseys Pass	BOLD:ACI5948	3	2.724359
OTU-22	NZPYR249-20	MTD 7475	0.42505252	0.6379585	Scopariinae	Eudonia diphtheralis	Methven	BOLD:ACI5948	3	2.724359
OTU-23	NZPYR078-20	MTD 6585	0.48076925	0.48076925	Crambinae	Orocrambus angustipennis	Methven	BOLD:AEB9873	2	5.6360707
OTU-23	NZPYR317-20	MTD 7543	0.48076925	0.48076925	Crambinae	Orocrambus angustipennis	Lawrence	BOLD:AEB9873	2	5.6360707
OTU-24	NZPYR091-20	MTD 6599	0.85854876	2.310231	Phycitinae	Patagoniodes farinaria	Nelson	BOLD:AAB3411	6	10.333333
OTU-24	NZPYR162-20	MTD 6674	0.85854876	2.310231	Phycitinae	Patagoniodes farinaria	Nelson	BOLD:AAB3411	6	10.333333
OTU-24	NZPYR163-20	MTD 6675	0.85854876	2.310231	Phycitinae	Patagoniodes farinaria	Taranaki Dollys Farm	BOLD:AAB3411	6	10.333333
OTU-24	NZPYR164-20	MTD 6676	0.85854876	2.310231	Phycitinae	Patagoniodes farinaria	Nelson	BOLD:AAB3411	6	10.333333
OTU-24	NZPYR349-20	MTD 7575	0.85854876	2.310231	Phycitinae	Patagoniodes farinaria	Waikawa	BOLD:AAB3411	6	10.333333
OTU-24	NZPYR350-20	MTD 7576	0.85854876	2.310231	Phycitinae	Patagoniodes farinaria	Waikawa	BOLD:AAB3411	6	10.333333
OTU-25	NZPYR082-20	MTD 6590	0	0	Scopariinae	Scoparia ustimacula	Karamea	BOLD:AEB8936	1	5.3067994
OTU-26	NZPYR099-20	MTD 6607	0.3119968	1.2882447	Crambinae	Orocrambus creneus	Lake Ashburton	BOLD:AEC0195	9	7.3015876
OTU-26	NZPYR303-20	MTD 7529	0.3119968	1.2882447	Crambinae	Orocrambus creneus	Sutton Salt Lake	BOLD:AEC0195	9	7.3015876
OTU-26	NZPYR304-20	MTD 7530	0.3119968	1.2882447	Crambinae	Orocrambus creneus	Sutton Salt Lake	BOLD:AEC0195	9	7.3015876
OTU-26	NZPYR305-20	MTD 7531	0.3119968	1.2882447	Crambinae	Orocrambus creneus	Sutton Salt Lake	BOLD:AEC0195	9	7.3015876
OTU-26	NZPYR306-20	MTD 7532	0.3119968	1.2882447	Crambinae	Orocrambus creneus	Sutton Salt Lake	BOLD:AEC0195	9	7.3015876
OTU-26	NZPYR307-20	MTD 7533	0.3119968	1.2882447	Crambinae	Orocrambus creneus	Sutton Salt Lake	BOLD:AEC0195	9	7.3015876
OTU-26	NZPYR308-20	MTD 7534	0.3119968	1.2882447	Crambinae	Orocrambus creneus	Sutton Salt Lake	BOLD:AEC0195	9	7.3015876
OTU-26	NZPYR322-20	MTD 7548	0.3119968	1.2882447	Crambinae	Orocrambus creneus	Sutton Salt Lake	BOLD:AEC0195	9	7.3015876
OTU-26	NZPYR364-20	MTD 7590	0.3119968	1.2882447	Crambinae	Orocrambus creneus	Sutton Salt Lake	BOLD:AEC0195	9	7.3015876
OTU-27	NZPYR092-20	MTD 6600	0	0	Phycitinae	Crocydopora cinigerella	Taranaki Hollard Garden	BOLD:ACH7410	1	8.856683
OTU-28	NZPYR102-20	MTD 6610	0	0	Crambinae	Orocrambus ramosellus	Taranaki Hollard Garden	BOLD:AEC1183	1	3.4146342
OTU-29	NZPYR100-20	MTD 6608	0.31853142	2.0304568	Crambinae	Orocrambus ramosellus	Burkes Pass	BOLD:ADY8163	18	2.2988505
OTU-29	NZPYR109-20	MTD 6617	0.31853142	2.0304568	Crambinae	Orocrambus ramosellus	Burkes Pass	BOLD:ADY8163	18	2.2988505
OTU-29	NZPYR129-20	MTD 6637	0.31853142	2.0304568	Crambinae	Orocrambus ramosellus	Mt. Potts	BOLD:ADY8163	18	2.2988505
OTU-29	NZPYR130-20	MTD 6638	0.31853142	2.0304568	Crambinae	Orocrambus ramosellus	Lake Ashburton	BOLD:ADY8163	18	2.2988505
OTU-29	NZPYR131-20	MTD 6639	0.31853142	2.0304568	Crambinae	Orocrambus ramosellus	Lake Roundabout	BOLD:ADY8163	18	2.2988505
OTU-29	NZPYR132-20	MTD 6640	0.31853142	2.0304568	Crambinae	Orocrambus ramosellus	Burkes Pass	BOLD:ADY8163	18	2.2988505
OTU-29	NZPYR158-20	MTD 6670	0.31853142	2.0304568	Crambinae	Orocrambus ramosellus	Lake Ashburton	BOLD:ADY8163	18	2.2988505
OTU-29	NZPYR159-20	MTD 6671	0.31853142	2.0304568	Crambinae	Orocrambus ramosellus	Lake Roundabout	BOLD:ADY8163	18	2.2988505
OTU-29	NZPYR160-20	MTD 6672	0.31853142	2.0304568	Crambinae	Orocrambus ramosellus	Lake Ashburton	BOLD:ADY8163	18	2.2988505
OTU-29	NZPYR314-20	MTD 7540	0.31853142	2.0304568	Crambinae	Orocrambus ramosellus	Lawrence Gabriels Gully	BOLD:ADY8163	18	2.2988505
OTU-29	NZPYR316-20	MTD 7542	0.31853142	2.0304568	Crambinae	Orocrambus ramosellus	Lawrence Steep Street	BOLD:ADY8163	18	2.2988505
OTU-29	NZPYR318-20	MTD 7544	0.31853142	2.0304568	Crambinae	Orocrambus ramosellus	Danseys Pass	BOLD:ADY8163	18	2.2988505
OTU-29	NZPYR356-20	MTD 7582	0.31853142	2.0304568	Crambinae	Orocrambus ramosellus	Lawrence Gabriels Gully	BOLD:ADY8163	18	2.2988505
OTU-29	NZPYR357-20	MTD 7583	0.31853142	2.0304568	Crambinae	Orocrambus ramosellus	Lawrence Gabriels Gully	BOLD:ADY8163	18	2.2988505
OTU-29	NZPYR363-20	MTD 7589	0.31853142	2.0304568	Crambinae	Orocrambus ramosellus	Lawrence Gabriels Gully	BOLD:ADY8163	18	2.2988505
OTU-29	NZPYR410-20	MTD 7636	0.31853142	2.0304568	Crambinae	Orocrambus ramosellus	Lake Ashburton	BOLD:ADY8163	18	2.2988505
OTU-29	NZPYR430-20	MTD 7856	0.31853142	2.0304568	Crambinae	Orocrambus ramosellus	Sutton Salt Lake	BOLD:ADY8163	18	2.2988505
OTU-29	NZPYR541-20	MTD 7865	0.31853142	2.0304568	Crambinae	Orocrambus ramosellus	Methven	BOLD:ADY8163	18	2.2988505
OTU-30	NZPYR107-20	MTD 6615	0	0	Crambinae	Orocrambus enchephorus	Nelson	BOLD:AEB8631	1	5.718954
OTU-31	NZPYR111-20	MTD 6619	0	0	Scopariinae	Eudonia sp.	Nelson	BOLD:AEB9399	1	3.208556
OTU-32	NZPYR103-20	MTD 6611	0	0	Crambinae	Orocrambus ordishi	Peel Forest Lake Pukaki	BOLD:AEC0370	1	2.6041665
OTU-33	NZPYR135-20	MTD 6643	0.21367522	0.32051283	Scopariinae	Eudonia cataxesta	Methven	BOLD:AEB7794	3	4.5
OTU-33	NZPYR275-20	MTD 7501	0.21367522	0.32051283	Scopariinae	Eudonia cataxesta	Cambrians	BOLD:AEB7794	3	4.5
OTU-33	NZPYR276-20	MTD 7502	0.21367522	0.32051283	Scopariinae	Eudonia cataxesta	Cambrians	BOLD:AEB7794	3	4.5
OTU-34	NZPYR136-20	MTD 6644	0	0	Scopariinae	Eudonia trivirgata	Taranaki Hollard Garden	BOLD:ACX6519	1	5.7971015
OTU-35	NZPYR124-20	MTD 6632	0.50883335	1.5	Crambinae	Orocrambus flexuosellus	Karamea	BOLD:ACP5842	26	7.371795
OTU-35	NZPYR125-20	MTD 6633	0.50883335	1.5	Crambinae	Orocrambus flexuosellus	Taranaki Hollard Garden	BOLD:ACP5842	26	7.371795
OTU-35	NZPYR126-20	MTD 6634	0.50883335	1.5	Crambinae	Orocrambus flexuosellus	Nelson	BOLD:ACP5842	26	7.371795
OTU-35	NZPYR127-20	MTD 6635	0.50883335	1.5	Crambinae	Orocrambus flexuosellus	Methven	BOLD:ACP5842	26	7.371795
OTU-35	NZPYR184-20	MTD 6696	0.50883335	1.5	Crambinae	Orocrambus flexuosellus	Taranaki Hollard Garden	BOLD:ACP5842	26	7.371795
OTU-35	NZPYR185-20	MTD 6697	0.50883335	1.5	Crambinae	Orocrambus flexuosellus	Taranaki Hollard Garden	BOLD:ACP5842	26	7.371795
OTU-35	NZPYR195-20	MTD 6707	0.50883335	1.5	Crambinae	Orocrambus flexuosellus	Nelson	BOLD:ACP5842	26	7.371795
OTU-35	NZPYR210-20	MTD 6722	0.50883335	1.5	Crambinae	Orocrambus flexuosellus	Waikawa	BOLD:ACP5842	26	7.371795
OTU-35	NZPYR212-20	MTD 6724	0.50883335	1.5	Crambinae	Orocrambus flexuosellus	Karamea	BOLD:ACP5842	26	7.371795
OTU-35	NZPYR213-20	MTD 6725	0.50883335	1.5	Crambinae	Orocrambus flexuosellus	Danseys Pass	BOLD:ACP5842	26	7.371795
OTU-35	NZPYR215-20	MTD 6727	0.50883335	1.5	Crambinae	Orocrambus flexuosellus	Lawrence Steep Street	BOLD:ACP5842	26	7.371795
OTU-35	NZPYR216-20	MTD 6728	0.50883335	1.5	Crambinae	Orocrambus flexuosellus	Lawrence Steep Street	BOLD:ACP5842	26	7.371795
OTU-35	NZPYR217-20	MTD 6729	0.50883335	1.5	Crambinae	Orocrambus flexuosellus	Lawrence Gabriels Gully	BOLD:ACP5842	26	7.371795
OTU-35	NZPYR301-20	MTD 7527	0.50883335	1.5	Crambinae	Orocrambus flexuosellus	Cambrians	BOLD:ACP5842	26	7.371795
OTU-35	NZPYR302-20	MTD 7528	0.50883335	1.5	Crambinae	Orocrambus flexuosellus	Cambrians	BOLD:ACP5842	26	7.371795
OTU-35	NZPYR324-20	MTD 7550	0.50883335	1.5	Crambinae	Orocrambus flexuosellus	Cambrians	BOLD:ACP5842	26	7.371795
OTU-35	NZPYR325-20	MTD 7551	0.50883335	1.5	Crambinae	Orocrambus flexuosellus	Cambrians	BOLD:ACP5842	26	7.371795
OTU-35	NZPYR326-20	MTD 7552	0.50883335	1.5	Crambinae	Orocrambus flexuosellus	Cambrians	BOLD:ACP5842	26	7.371795
OTU-35	NZPYR327-20	MTD 7553	0.50883335	1.5	Crambinae	Orocrambus flexuosellus	Cambrians	BOLD:ACP5842	26	7.371795
OTU-35	NZPYR328-20	MTD 7554	0.50883335	1.5	Crambinae	Orocrambus flexuosellus	Methven	BOLD:ACP5842	26	7.371795
OTU-35	NZPYR329-20	MTD 7555	0.50883335	1.5	Crambinae	Orocrambus flexuosellus	Methven	BOLD:ACP5842	26	7.371795
OTU-35	NZPYR408-20	MTD 7634	0.50883335	1.5	Crambinae	Orocrambus flexuosellus	Lawrence Gabriels Gully	BOLD:ACP5842	26	7.371795
OTU-35	NZPYR441-20	MTD 7868	0.50883335	1.5	Crambinae	Orocrambus flexuosellus	Methven	BOLD:ACP5842	26	7.371795
OTU-35	NZPYR442-20	MTD 7869	0.50883335	1.5	Crambinae	Orocrambus flexuosellus	Cambrians	BOLD:ACP5842	26	7.371795
OTU-35	NZPYR443-20	MTD 7870	0.50883335	1.5	Crambinae	Orocrambus flexuosellus	Methven	BOLD:ACP5842	26	7.371795
OTU-35	NZPYR444-20	MTD 7871	0.50883335	1.5	Crambinae	Orocrambus flexuosellus	Cambrians	BOLD:ACP5842	26	7.371795
OTU-36	NZPYR128-20	MTD 6636	0	0	Crambinae	Orocrambus ramosellus	Peel Forest Lake Pukaki	BOLD:AEC1186	1	2.724359
OTU-37	NZPYR141-20	MTD 6649	0.80515295	0.80515295	Scopariinae	Eudonia chlamydota	Taranaki Hollard Garden	BOLD:ADY7797	2	5.448718
OTU-37	NZPYR283-20	MTD 7509	0.80515295	0.80515295	Scopariinae	Eudonia chlamydota	Lawrence Gabriels Gully	BOLD:ADY7797	2	5.448718
OTU-38	NZPYR155-20	MTD 6667	0.30737212	0.8090615	Scopariinae	Scoparia chalicodes	Nelson	BOLD:ACP2188	10	5.769231
OTU-38	NZPYR156-20	MTD 6668	0.30737212	0.8090615	Scopariinae	Scoparia chalicodes	Nelson	BOLD:ACP2188	10	5.769231
OTU-38	NZPYR157-20	MTD 6669	0.30737212	0.8090615	Scopariinae	Scoparia chalicodes	Nelson	BOLD:ACP2188	10	5.769231
OTU-38	NZPYR242-20	MTD 7465	0.30737212	0.8090615	Scopariinae	Scoparia chalicodes	Methven	BOLD:ACP2188	10	5.769231
OTU-38	NZPYR245-20	MTD 7470	0.30737212	0.8090615	Scopariinae	Scoparia chalicodes	Methven	BOLD:ACP2188	10	5.769231
OTU-38	NZPYR273-20	MTD 7499	0.30737212	0.8090615	Scopariinae	Scoparia chalicodes	Methven	BOLD:ACP2188	10	5.769231
OTU-38	NZPYR274-20	MTD 7500	0.30737212	0.8090615	Scopariinae	Scoparia chalicodes	Methven	BOLD:ACP2188	10	5.769231
OTU-38	NZPYR415-20	MTD 7641	0.30737212	0.8090615	Scopariinae	Scoparia chalicodes	Lawrence Steep Street	BOLD:ACP2188	10	5.769231
OTU-38	NZPYR417-20	MTD 7843	0.30737212	0.8090615	Scopariinae	Scoparia chalicodes	Lawrence Gabriels Gully	BOLD:ACP2188	10	5.769231
OTU-38	NZPYR418-20	MTD 7844	0.30737212	0.8090615	Scopariinae	Scoparia chalicodes	Methven	BOLD:ACP2188	10	5.769231
OTU-39	NZPYR139-20	MTD 6647	0.5365105	0.80515295	Scopariinae	Eudonia minusculalis	Karamea	BOLD:AEB8980	3	6.1191626
OTU-39	NZPYR238-20	MTD 7461	0.5365105	0.80515295	Scopariinae	Eudonia minusculalis	Lawrence Gabriels Gully	BOLD:AEB8980	3	6.1191626
OTU-39	NZPYR239-20	MTD 7462	0.5365105	0.80515295	Scopariinae	Eudonia minusculalis	Lawrence Gabriels Gully	BOLD:AEB8980	3	6.1191626
OTU-40	NZPYR140-20	MTD 6648	0	0	Scopariinae	Eudonia aspidota	Karamea	BOLD:ADY9207	1	6.1904764
OTU-41	NZPYR172-20	MTD 6684	1.1778091	1.6103059	Spilomelinae	Mnesictena flavidalis	Taranaki Hollard Garden	BOLD:AEB7495	3	5.152979
OTU-41	NZPYR344-20	MTD 7570	1.1778091	1.6103059	Spilomelinae	Mnesictena flavidalis	Cambrians	BOLD:AEB7495	3	5.152979
OTU-41	NZPYR345-20	MTD 7571	1.1778091	1.6103059	Spilomelinae	Mnesictena flavidalis	Waikawa	BOLD:AEB7495	3	5.152979
OTU-42	NZPYR173-20	MTD 6685	0.93677443	1.2882447	Spilomelinae	Mnesictena marmarina	Taranaki Dollys Farm	BOLD:AEB7275	4	5.152979
OTU-42	NZPYR186-20	MTD 6698	0.93677443	1.2882447	Spilomelinae	Mnesictena marmarina	Taranaki Dollys Farm	BOLD:AEB7275	4	5.152979
OTU-42	NZPYR346-20	MTD 7572	0.93677443	1.2882447	Spilomelinae	Mnesictena marmarina	Cambrians	BOLD:AEB7275	4	5.152979
OTU-42	NZPYR347-20	MTD 7573	0.93677443	1.2882447	Spilomelinae	Mnesictena marmarina	Waikawa	BOLD:AEB7275	4	5.152979
OTU-43	NZPYR165-20	MTD 6677	0.83315635	1.8518518	Crambinae	Glaucocharis lepidella	Taranaki Hollard Garden	BOLD:AEB7481	6	6.166667
OTU-43	NZPYR166-20	MTD 6678	0.83315635	1.8518518	Crambinae	Glaucocharis lepidella	Karamea	BOLD:AEB7481	6	6.166667
OTU-43	NZPYR167-20	MTD 6679	0.83315635	1.8518518	Crambinae	Glaucocharis lepidella	Nelson	BOLD:AEB7481	6	6.166667
OTU-43	NZPYR168-20	MTD 6680	0.83315635	1.8518518	Crambinae	Glaucocharis lepidella	Karamea	BOLD:AEB7481	6	6.166667
OTU-43	NZPYR169-20	MTD 6681	0.83315635	1.8518518	Crambinae	Glaucocharis lepidella	Karamea	BOLD:AEB7481	6	6.166667
OTU-43	NZPYR501-20	MTD 9129	0.83315635	1.8518518	Crambinae	Glaucocharis helioctypa	Denniston Incline	BOLD:AEB7481	6	6.166667
OTU-44	NZPYR170-20	MTD 6682	0.8665995	1.8062398	Pyraustinae	Uresiphita polygonalis	Karamea	BOLD:ACX2874	6	8.173077
OTU-44	NZPYR171-20	MTD 6683	0.8665995	1.8062398	Pyraustinae	Uresiphita polygonalis	Karamea	BOLD:ACX2874	6	8.173077
OTU-44	NZPYR334-20	MTD 7560	0.8665995	1.8062398	Pyraustinae	Uresiphita polygonalis	Cambrians	BOLD:ACX2874	6	8.173077
OTU-44	NZPYR335-20	MTD 7561	0.8665995	1.8062398	Pyraustinae	Uresiphita polygonalis	Cambrians	BOLD:ACX2874	6	8.173077
OTU-44	NZPYR336-20	MTD 7562	0.8665995	1.8062398	Pyraustinae	Uresiphita polygonalis	Cambrians	BOLD:ACX2874	6	8.173077
OTU-44	NZPYR337-20	MTD 7563	0.8665995	1.8062398	Pyraustinae	Uresiphita polygonalis	Waikawa	BOLD:ACX2874	6	8.173077
OTU-45	NZPYR177-20	MTD 6689	0	0	Crambinae	Argyria strophaea	Karamea	BOLD:AEC0826	1	9.569378
OTU-46	NZPYR176-20	MTD 6688	0.21510255	0.96618354	Acentropinae	Hygraula nitens	Karamea	BOLD:ACX6406	9	9.134615
OTU-46	NZPYR188-20	MTD 6700	0.21510255	0.96618354	Acentropinae	Hygraula nitens	Taranaki Dollys Farm	BOLD:ACX6406	9	9.134615
OTU-46	NZPYR194-20	MTD 6706	0.21510255	0.96618354	Acentropinae	Hygraula nitens	Taranaki Dollys Farm	BOLD:ACX6406	9	9.134615
OTU-46	NZPYR338-20	MTD 7564	0.21510255	0.96618354	Acentropinae	Hygraula nitens	Lawrence Steep Street	BOLD:ACX6406	9	9.134615
OTU-46	NZPYR339-20	MTD 7565	0.21510255	0.96618354	Acentropinae	Hygraula nitens	Lawrence Steep Street	BOLD:ACX6406	9	9.134615
OTU-46	NZPYR340-20	MTD 7566	0.21510255	0.96618354	Acentropinae	Hygraula nitens	Cambrians	BOLD:ACX6406	9	9.134615
OTU-46	NZPYR341-20	MTD 7567	0.21510255	0.96618354	Acentropinae	Hygraula nitens	Lawrence Steep Street	BOLD:ACX6406	9	9.134615
OTU-46	NZPYR342-20	MTD 7568	0.21510255	0.96618354	Acentropinae	Hygraula nitens	Cambrians	BOLD:ACX6406	9	9.134615
OTU-46	NZPYR343-20	MTD 7569	0.21510255	0.96618354	Acentropinae	Hygraula nitens	Lawrence Gabriels Gully	BOLD:ACX6406	9	9.134615
OTU-47	NZPYR175-20	MTD 6687	0	0	Musotiminae	Musotima nitidalis	Karamea	BOLD:AEB9225	1	9.268292
OTU-48	NZPYR174-20	MTD 6686	0	0	Spilomelinae	Leucinodes cordalis	Karamea	BOLD:AAB7127	1	8.899676
OTU-49	NZPYR181-20	MTD 6693	1.3922437	1.9323671	Crambinae	Gadira acerella	Taranaki Hollard Garden	BOLD:ADY7644	4	9.618573
OTU-49	NZPYR187-20	MTD 6699	1.3922437	1.9323671	Crambinae	Gadira acerella	Nelson	BOLD:AEB8340	4	9.618573
OTU-49	NZPYR332-20	MTD 7558	1.3922437	1.9323671	Crambinae	Gadira acerella	Lawrence Steep Street	BOLD:ADY7644	4	9.618573
OTU-49	NZPYR333-20	MTD 7559	1.3922437	1.9323671	Crambinae	Gadira acerella	Lawrence Gabriels Gully	BOLD:AEB8340	4	9.618573
OTU-50	NZPYR180-20	MTD 6692	0.32520324	0.32520324	Crambinae	Glaucocharis selenaea	Te Wairoa Reserve	BOLD:ADZ0896	2	3.3653848
OTU-50	NZPYR191-20	MTD 6703	0.32520324	0.32520324	Crambinae	Glaucocharis selenaea	Te Wairoa Reserve	BOLD:ADZ0896	2	3.3653848
OTU-51	NZPYR179-20	MTD 6691	0	0	Crambinae	Glaucocharis interrupta	Karamea	BOLD:AEC0351	1	6.166667
OTU-52	NZPYR178-20	MTD 6690	0.0	0.0	Crambinae	Glaucocharis elaina	Karamea	BOLD:AEB7502	2	6.1191626
OTU-52	NZPYR189-20	MTD 6701	0.0	0.0	Crambinae	Glaucocharis elaina	Karamea	BOLD:AEB7502	2	6.1191626
OTU-53	NZPYR254-20	MTD 7480	0.15948963	0.15948963	Scopariinae	Eudonia cyptastis	Lawrence Gabriels Gully	BOLD:AEB9669	2	5.769231
OTU-53	NZPYR282-20	MTD 7508	0.15948963	0.15948963	Scopariinae	Eudonia cyptastis	Waikawa	BOLD:AEB9669	2	5.769231
OTU-54	NZPYR250-20	MTD 7476	0.8488393	1.1111112	Scopariinae	Scoparia rotuella	Waikawa	BOLD:AEB9122	3	6.1904764
OTU-54	NZPYR251-20	MTD 7477	0.8488393	1.1111112	Scopariinae	Scoparia rotuella	Waikawa	BOLD:AEB9122	3	6.1904764
OTU-54	NZPYR414-20	MTD 7640	0.8488393	1.1111112	Scopariinae	Scoparia rotuella	Lawrence	BOLD:AEB9122	3	6.1904764
OTU-55	NZPYR183-20	MTD 6695	0.21680216	0.32520324	Crambinae	Glaucocharis auriscriptella	Karamea	BOLD:ACX6862	3	4.0064106
OTU-55	NZPYR192-20	MTD 6704	0.21680216	0.32520324	Crambinae	Glaucocharis auriscriptella	Te Wairoa Reserve	BOLD:ACX6862	3	4.0064106
OTU-55	NZPYR193-20	MTD 6705	0.21680216	0.32520324	Crambinae	Glaucocharis auriscriptella	Nelson	BOLD:ACX6862	3	4.0064106
OTU-56	NZPYR182-20	MTD 6694	0.48309177	0.48309177	Crambinae	Glaucocharis chrysochyta	Karamea	BOLD:AEA4269	2	3.3653848
OTU-56	NZPYR190-20	MTD 6702	0.48309177	0.48309177	Crambinae	Glaucocharis chrysochyta	Karamea	BOLD:AEA4269	2	3.3653848
OTU-57	NZPYR293-20	MTD 7519	0	0	Scopariinae	Scoparia ustimacula	Waikawa	BOLD:AEB8935	1	5.3067994
OTU-58	NZPYR285-20	MTD 7511	0	0	Scopariinae	Antiscopa elaphra	Lawrence Steep Street	BOLD:AEB8487	1	8.534621
OTU-59	NZPYR284-20	MTD 7510	0	0	Scopariinae	Scoparia cyameuta	Lawrence Gabriels Gully	BOLD:AEB7942	1	5.7416267
OTU-60	NZPYR265-20	MTD 7491	0.0	0.0	Scopariinae	Eudonia feredayi	Lawrence Gabriels Gully	BOLD:AEB7256	2	5.0
OTU-60	NZPYR266-20	MTD 7492	0.0	0.0	Scopariinae	Eudonia feredayi	Lawrence Gabriels Gully	BOLD:AEB7256	2	5.0
OTU-61	NZPYR330-20	MTD 7556	0	0	Spilomelinae	Deana hybreasalis	Lawrence Gabriels Gully	BOLD:ACD8360	1	9.822866
OTU-62	NZPYR348-20	MTD 7574	0	0	Phycitinae	Delogenes limodoxa	Waikawa	BOLD:AEC0835	1	9.061488
OTU-63	NZPYR401-20	MTD 7627	0	0	Pyraustinae	Achyra affinitalis	Cambrians	BOLD:AAA2673	1	8.534621
OTU-64	NZPYR498-20	MTD 9126	0	0	Crambinae	Glaucocharis bipunctella	Herekino Kaitaia Walkway	BOLD:AEB7991	1	4.0
OTU-65	NZPYR309-20	MTD 7535	0.48076925	0.48076925	Crambinae	Orocrambus vulgaris	Lawrence Gabriels Gully	BOLD:AEC1069	2	3.9800994
OTU-65	NZPYR310-20	MTD 7536	0.48076925	0.48076925	Crambinae	Orocrambus vulgaris	Lawrence Gabriels Gully	BOLD:AEC1069	2	3.9800994
OTU-66	NZPYR315-20	MTD 7541	0.32051283	0.32051283	Crambinae	Orocrambus ramosellus	Cambrians	BOLD:AEC1185	2	2.2988505
OTU-66	NZPYR319-20	MTD 7545	0.32051283	0.32051283	Crambinae	Orocrambus ramosellus	Lawrence	BOLD:AEC1185	2	2.2988505
OTU-67	NZPYR321-20	MTD 7547	1.5151515	1.5151515	Crambinae	Orocrambus apicellus	Danseys Pass	BOLD:ADZ1307	2	3.5650623
OTU-67	NZPYR510-20	MTD 9135	1.5151515	1.5151515	Crambinae	Orocrambus apicellus	Chatham Island Ocean mail resort	BOLD:ADZ1307	2	3.5650623
OTU-68	NZPYR323-20	MTD 7549	0	0	Crambinae	Orocrambus ramosellus	Cambrians	BOLD:AEC1184	1	2.3333333
OTU-69	NZPYR507-20	MTD 9134	0	0	Crambinae	Kupea electilis	Birdlings flat	BOLD:AEC1316	1	6.31068
OTU-70	NZPYR514-20	MTD 9139	0	0	Crambinae	Orocrambus catacaustus	Arthurs Pass Bealey track	BOLD:AEB8723	1	8.05153
OTU-71	NZPYR516-20	MTD 9140	0	0	Crambinae	Orocrambus cyclopicus	Woodbury Rae road	BOLD:AEB8630	1	6.0755334
OTU-72	NZPYR519-20	MTD 9142	0	0	Crambinae	Orocrambus epherus	Upper Awatere Valley	BOLD:AEB9001	1	5.6360707
OTU-73	NZPYR499-20	MTD 9127	0.0	0.0	Crambinae	Glaucocharis epiphaea	Mangawhero loop	BOLD:AEC0352	2	4.647436
OTU-73	NZPYR500-20	MTD 9128	0.0	0.0	Crambinae	Glaucocharis harmonica	Mt. Te Aroa	BOLD:AEC0352	2	4.647436
OTU-74	NZPYR503-20	MTD 9131	0	0	Crambinae	Glaucocharis leucoxantha	Mahakirau Coromandel	BOLD:ADY6638	1	4.3689322
OTU-75	NZPYR505-20	MTD 9132	0	0	Crambinae	Glaucocharis parorma	Mahakirau Coromandel	BOLD:ADZ0419	1	6.7961164
OTU-76	NZPYR506-20	MTD 9133	0	0	Crambinae	Glaucocharis pyrsophanes	Mahakirau Coromandel	BOLD:ADZ0897	1	5.7971015
OTU-77	NZPYR062-20	MTD 6569	0.1862851	1.132686	Scopariinae	Eudonia leptalea	Methven	BOLD:ACA4753	35	1.1111112
OTU-77	NZPYR084-20	MTD 6592	0.1862851	1.132686	Scopariinae	Eudonia leptalea	Methven	BOLD:ACA4753	35	1.1111112
OTU-77	NZPYR110-20	MTD 6618	0.1862851	1.132686	Scopariinae	Eudonia leptalea	Nelson	BOLD:ACA4753	35	1.1111112
OTU-77	NZPYR147-20	MTD 6655	0.1862851	1.132686	Scopariinae	Eudonia leptalea	Methven	BOLD:ACA4753	35	1.1111112
OTU-77	NZPYR150-20	MTD 6660	0.1862851	1.132686	Scopariinae	Eudonia leptalea	Methven	BOLD:ACA4753	35	1.1111112
OTU-77	NZPYR204-20	MTD 6716	0.1862851	1.132686	Scopariinae	Eudonia leptalea	Methven	BOLD:ACA4753	35	1.1111112
OTU-77	NZPYR208-20	MTD 6720	0.1862851	1.132686	Scopariinae	Eudonia leptalea	Nelson	BOLD:ACA4753	35	1.1111112
OTU-77	NZPYR232-20	MTD 7455	0.1862851	1.132686	Scopariinae	Eudonia leptalea	Waikawa	BOLD:ACA4753	35	1.1111112
OTU-77	NZPYR233-20	MTD 7456	0.1862851	1.132686	Scopariinae	Eudonia leptalea	Waikawa	BOLD:ACA4753	35	1.1111112
OTU-77	NZPYR234-20	MTD 7457	0.1862851	1.132686	Scopariinae	Eudonia leptalea	Waikawa	BOLD:ACA4753	35	1.1111112
OTU-77	NZPYR243-20	MTD 7466	0.1862851	1.132686	Scopariinae	Eudonia leptalea	Methven	BOLD:ACA4753	35	1.1111112
OTU-77	NZPYR235-20	MTD 7458	0.1862851	1.132686	Scopariinae	Eudonia leptalea	Waikawa	BOLD:ACA4753	35	1.1111112
OTU-77	NZPYR268-20	MTD 7494	0.1862851	1.132686	Scopariinae	Eudonia leptalea	Methven	BOLD:ACA4753	35	1.1111112
OTU-77	NZPYR267-20	MTD 7493	0.1862851	1.132686	Scopariinae	Eudonia leptalea	Waikawa	BOLD:ACA4753	35	1.1111112
OTU-77	NZPYR278-20	MTD 7504	0.1862851	1.132686	Scopariinae	Eudonia leptalea	Waikawa	BOLD:ACA4753	35	1.1111112
OTU-77	NZPYR277-20	MTD 7503	0.1862851	1.132686	Scopariinae	Eudonia leptalea	Waikawa	BOLD:ACA4753	35	1.1111112
OTU-77	NZPYR280-20	MTD 7506	0.1862851	1.132686	Scopariinae	Eudonia leptalea	Waikawa	BOLD:ACA4753	35	1.1111112
OTU-77	NZPYR279-20	MTD 7505	0.1862851	1.132686	Scopariinae	Eudonia leptalea	Waikawa	BOLD:ACA4753	35	1.1111112
OTU-77	NZPYR290-20	MTD 7516	0.1862851	1.132686	Scopariinae	Eudonia leptalea	Lawrence	BOLD:ACA4753	35	1.1111112
OTU-77	NZPYR289-20	MTD 7515	0.1862851	1.132686	Scopariinae	Eudonia leptalea	Waikawa	BOLD:ACA4753	35	1.1111112
OTU-77	NZPYR380-20	MTD 7606	0.1862851	1.132686	Scopariinae	Eudonia leptalea	Lawrence Gabriels Gully	BOLD:ACA4753	35	1.1111112
OTU-77	NZPYR331-20	MTD 7557	0.1862851	1.132686	Scopariinae	Eudonia leptalea	Methven	BOLD:ACA4753	35	1.1111112
OTU-77	NZPYR397-20	MTD 7623	0.1862851	1.132686	Scopariinae	Eudonia leptalea	Waikawa	BOLD:ACA4753	35	1.1111112
OTU-77	NZPYR391-20	MTD 7617	0.1862851	1.132686	Scopariinae	Eudonia leptalea	Waikawa	BOLD:ACA4753	35	1.1111112
OTU-77	NZPYR399-20	MTD 7625	0.1862851	1.132686	Scopariinae	Eudonia leptalea	Waikawa	BOLD:ACA4753	35	1.1111112
OTU-77	NZPYR398-20	MTD 7624	0.1862851	1.132686	Scopariinae	Eudonia leptalea	Methven	BOLD:ACA4753	35	1.1111112
OTU-77	NZPYR406-20	MTD 7632	0.1862851	1.132686	Scopariinae	Eudonia leptalea	Waikawa	BOLD:ACA4753	35	1.1111112
OTU-77	NZPYR407-20	MTD 7633	0.1862851	1.132686	Scopariinae	Eudonia leptalea	Waikawa	BOLD:ACA4753	35	1.1111112
OTU-77	NZPYR402-20	MTD 7628	0.1862851	1.132686	Scopariinae	Eudonia leptalea	Cambrians Reserve	BOLD:ACA4753	35	1.1111112
OTU-77	NZPYR403-20	MTD 7629	0.1862851	1.132686	Scopariinae	Eudonia leptalea	Waikawa	BOLD:ACA4753	35	1.1111112
OTU-77	NZPYR434-20	MTD 7860	0.1862851	1.132686	Scopariinae	Eudonia leptalea	Waikawa	BOLD:ACA4753	35	1.1111112
OTU-77	NZPYR436-20	MTD 7862	0.1862851	1.132686	Scopariinae	Eudonia leptalea	Cambrians	BOLD:ACA4753	35	1.1111112
OTU-77	NZPYR432-20	MTD 7858	0.1862851	1.132686	Scopariinae	Eudonia leptalea	Methven	BOLD:ACA4753	35	1.1111112
OTU-77	NZPYR433-20	MTD 7859	0.1862851	1.132686	Scopariinae	Eudonia leptalea	Methven	BOLD:ACA4753	35	1.1111112
OTU-77	NZPYR437-20	MTD 7863	0.1862851	1.132686	Scopariinae	Eudonia leptalea	Waikawa	BOLD:ACA4753	35	1.1111112
OTU-78	NZPYR055-20	MTD 6562	0.0	0.0	Scopariinae	Eudonia leptalea	Taranaki Dollys Farm	BOLD:ACA4753	6	1.1111112
OTU-78	NZPYR059-20	MTD 6566	0.0	0.0	Scopariinae	Eudonia leptalea	Taranaki Dollys Farm	BOLD:ACA4753	6	1.1111112
OTU-78	NZPYR106-20	MTD 6614	0.0	0.0	Scopariinae	Eudonia leptalea	Karamea	BOLD:ACA4753	6	1.1111112
OTU-78	NZPYR108-20	MTD 6616	0.0	0.0	Scopariinae	Eudonia leptalea	Taranaki Dollys Farm	BOLD:ACA4753	6	1.1111112
OTU-78	NZPYR148-20	MTD 6657	0.0	0.0	Scopariinae	Eudonia leptalea	Taranaki Hollard Garden	BOLD:ACA4753	6	1.1111112
OTU-78	NZPYR209-20	MTD 6721	0.0	0.0	Scopariinae	Eudonia leptalea	Karamea	BOLD:ACA4753	6	1.1111112
OTU-79	NZPYR093-20	MTD 6601	0.1650165	0.1650165	Crambinae	Orocrambus vitellus	Nelson	BOLD:ACP6432	2	1.7713366
OTU-79	NZPYR119-20	MTD 6627	0.1650165	0.1650165	Crambinae	Orocrambus vitellus	Nelson	BOLD:ACP6432	2	1.7713366
OTU-80	NZPYR069-20	MTD 6576	0.46358398	1.4634147	Crambinae	Orocrambus vitellus	Nelson	BOLD:ACP6432	54	1.6339871
OTU-80	NZPYR072-20	MTD 6579	0.46358398	1.4634147	Crambinae	Orocrambus vitellus	Nelson	BOLD:ACP6432	54	1.6339871
OTU-80	NZPYR075-20	MTD 6582	0.46358398	1.4634147	Crambinae	Orocrambus vitellus	Nelson	BOLD:ACP6432	54	1.6339871
OTU-80	NZPYR076-20	MTD 6583	0.46358398	1.4634147	Crambinae	Orocrambus vitellus	Methven	BOLD:ACP6432	54	1.6339871
OTU-80	NZPYR094-20	MTD 6602	0.46358398	1.4634147	Crambinae	Orocrambus vitellus	Nelson	BOLD:ACP6432	54	1.6339871
OTU-80	NZPYR095-20	MTD 6603	0.46358398	1.4634147	Crambinae	Orocrambus vitellus	Nelson	BOLD:ACP6432	54	1.6339871
OTU-80	NZPYR096-20	MTD 6604	0.46358398	1.4634147	Crambinae	Orocrambus vitellus	Taranaki Dollys Farm	BOLD:ACP6432	54	1.6339871
OTU-80	NZPYR098-20	MTD 6606	0.46358398	1.4634147	Crambinae	Orocrambus vitellus	Nelson	BOLD:ACP6432	54	1.6339871
OTU-80	NZPYR120-20	MTD 6628	0.46358398	1.4634147	Crambinae	Orocrambus vitellus	Nelson	BOLD:ACP6432	54	1.6339871
OTU-80	NZPYR121-20	MTD 6629	0.46358398	1.4634147	Crambinae	Orocrambus vitellus	Nelson	BOLD:ACP6432	54	1.6339871
OTU-80	NZPYR122-20	MTD 6630	0.46358398	1.4634147	Crambinae	Orocrambus vitellus	Peel Forest Lake Pukaki	BOLD:ACP6432	54	1.6339871
OTU-80	NZPYR123-20	MTD 6631	0.46358398	1.4634147	Crambinae	Orocrambus vitellus	Nelson	BOLD:ACP6432	54	1.6339871
OTU-80	NZPYR143-20	MTD 6651	0.46358398	1.4634147	Crambinae	Orocrambus vitellus	Nelson	BOLD:ACP6432	54	1.6339871
OTU-80	NZPYR197-20	MTD 6709	0.46358398	1.4634147	Crambinae	Orocrambus vitellus	Peel Forest Lake Pukaki	BOLD:ACP6432	54	1.6339871
OTU-80	NZPYR196-20	MTD 6708	0.46358398	1.4634147	Crambinae	Orocrambus vitellus	Burkes Pass	BOLD:ACP6432	54	1.6339871
OTU-80	NZPYR203-20	MTD 6715	0.46358398	1.4634147	Crambinae	Orocrambus vitellus	Nelson	BOLD:ACP6432	54	1.6339871
OTU-80	NZPYR198-20	MTD 6710	0.46358398	1.4634147	Crambinae	Orocrambus vitellus	Nelson	BOLD:ACP6432	54	1.6339871
OTU-80	NZPYR299-20	MTD 7525	0.46358398	1.4634147	Crambinae	Orocrambus vitellus	Methven	BOLD:ACP6432	54	1.6339871
OTU-80	NZPYR205-20	MTD 6717	0.46358398	1.4634147	Crambinae	Orocrambus vitellus	Nelson	BOLD:ACP6432	54	1.6339871
OTU-80	NZPYR311-20	MTD 7537	0.46358398	1.4634147	Crambinae	Orocrambus vitellus	Lawrence Gabriels Gully	BOLD:ACP6432	54	1.6339871
OTU-80	NZPYR300-20	MTD 7526	0.46358398	1.4634147	Crambinae	Orocrambus vitellus	Lawrence Gabriels Gully	BOLD:ACP6432	54	1.6339871
OTU-80	NZPYR313-20	MTD 7539	0.46358398	1.4634147	Crambinae	Orocrambus vitellus	Lawrence Gabriels Gully	BOLD:ACP6432	54	1.6339871
OTU-80	NZPYR312-20	MTD 7538	0.46358398	1.4634147	Crambinae	Orocrambus vitellus	Cambrians	BOLD:ACP6432	54	1.6339871
OTU-80	NZPYR351-20	MTD 7577	0.46358398	1.4634147	Crambinae	Orocrambus vitellus	Lawrence Gabriels Gully	BOLD:ACP6432	54	1.6339871
OTU-80	NZPYR320-20	MTD 7546	0.46358398	1.4634147	Crambinae	Orocrambus vitellus	Lawrence	BOLD:ACP6432	54	1.6339871
OTU-80	NZPYR353-20	MTD 7579	0.46358398	1.4634147	Crambinae	Orocrambus vitellus	Methven	BOLD:ACP6432	54	1.6339871
OTU-80	NZPYR352-20	MTD 7578	0.46358398	1.4634147	Crambinae	Orocrambus vitellus	Cambrians	BOLD:ACP6432	54	1.6339871
OTU-80	NZPYR355-20	MTD 7581	0.46358398	1.4634147	Crambinae	Orocrambus vitellus	Cambrians	BOLD:ACP6432	54	1.6339871
OTU-80	NZPYR354-20	MTD 7580	0.46358398	1.4634147	Crambinae	Orocrambus vitellus	Methven	BOLD:ACP6432	54	1.6339871
OTU-80	NZPYR360-20	MTD 7586	0.46358398	1.4634147	Crambinae	Orocrambus vitellus	Lawrence Gabriels Gully	BOLD:ACP6432	54	1.6339871
OTU-80	NZPYR361-20	MTD 7587	0.46358398	1.4634147	Crambinae	Orocrambus vitellus	Lawrence Gabriels Gully	BOLD:ACP6432	54	1.6339871
OTU-80	NZPYR358-20	MTD 7584	0.46358398	1.4634147	Crambinae	Orocrambus vitellus	Methven	BOLD:ACP6432	54	1.6339871
OTU-80	NZPYR359-20	MTD 7585	0.46358398	1.4634147	Crambinae	Orocrambus vitellus	Lawrence Gabriels Gully	BOLD:ACP6432	54	1.6339871
OTU-80	NZPYR366-20	MTD 7592	0.46358398	1.4634147	Crambinae	Orocrambus vitellus	Lawrence Gabriels Gully	BOLD:ACP6432	54	1.6339871
OTU-80	NZPYR367-20	MTD 7593	0.46358398	1.4634147	Crambinae	Orocrambus vitellus	Cambrians	BOLD:ACP6432	54	1.6339871
OTU-80	NZPYR362-20	MTD 7588	0.46358398	1.4634147	Crambinae	Orocrambus vitellus	Lawrence Gabriels Gully	BOLD:ACP6432	54	1.6339871
OTU-80	NZPYR365-20	MTD 7591	0.46358398	1.4634147	Crambinae	Orocrambus vitellus	Methven	BOLD:ACP6432	54	1.6339871
OTU-80	NZPYR370-20	MTD 7596	0.46358398	1.4634147	Crambinae	Orocrambus vitellus	Cambrians	BOLD:ACP6432	54	1.6339871
OTU-80	NZPYR371-20	MTD 7597	0.46358398	1.4634147	Crambinae	Orocrambus vitellus	Lawrence Gabriels Gully	BOLD:ACP6432	54	1.6339871
OTU-80	NZPYR368-20	MTD 7594	0.46358398	1.4634147	Crambinae	Orocrambus vitellus	Lawrence Gabriels Gully	BOLD:ACP6432	54	1.6339871
OTU-80	NZPYR369-20	MTD 7595	0.46358398	1.4634147	Crambinae	Orocrambus vitellus	Cambrians	BOLD:ACP6432	54	1.6339871
OTU-80	NZPYR374-20	MTD 7600	0.46358398	1.4634147	Crambinae	Orocrambus vitellus	Cambrians	BOLD:ACP6432	54	1.6339871
OTU-80	NZPYR427-20	MTD 7853	0.46358398	1.4634147	Crambinae	Orocrambus vitellus	Nelson	BOLD:ACP6432	54	1.6339871
OTU-80	NZPYR372-20	MTD 7598	0.46358398	1.4634147	Crambinae	Orocrambus vitellus	Cambrians	BOLD:ACP6432	54	1.6339871
OTU-80	NZPYR373-20	MTD 7599	0.46358398	1.4634147	Crambinae	Orocrambus vitellus	Cambrians	BOLD:ACP6432	54	1.6339871
OTU-80	NZPYR534-20	MTD 9163	0.46358398	1.4634147	Crambinae	Orocrambus vitellus	Methven	BOLD:ACP6432	54	1.6339871
OTU-80	NZPYR533-20	MTD 9162	0.46358398	1.4634147	Crambinae	Orocrambus vitellus	Methven	BOLD:ACP6432	54	1.6339871
OTU-80	NZPYR532-20	MTD 9161	0.46358398	1.4634147	Crambinae	Orocrambus vitellus	Methven	BOLD:ACP6432	54	1.6339871
OTU-80	NZPYR428-20	MTD 7854	0.46358398	1.4634147	Crambinae	Orocrambus vitellus	Nelson	BOLD:ACP6432	54	1.6339871
OTU-80	NZPYR538-20	MTD 9167	0.46358398	1.4634147	Crambinae	Orocrambus vitellus	Methven	BOLD:ACP6432	54	1.6339871
OTU-80	NZPYR537-20	MTD 9166	0.46358398	1.4634147	Crambinae	Orocrambus vitellus	Methven	BOLD:ACP6432	54	1.6339871
OTU-80	NZPYR536-20	MTD 9165	0.46358398	1.4634147	Crambinae	Orocrambus vitellus	Methven	BOLD:ACP6432	54	1.6339871
OTU-80	NZPYR535-20	MTD 9164	0.46358398	1.4634147	Crambinae	Orocrambus vitellus	Methven	BOLD:ACP6432	54	1.6339871
OTU-80	NZPYR540-20	MTD 9169	0.46358398	1.4634147	Crambinae	Orocrambus vitellus	Methven	BOLD:ACP6432	54	1.6339871
OTU-81	NZPYR523-20	MTD 9144	0	0	Crambinae	Orocrambus heliotes	Denniston plateau	BOLD:AEC1310	1	8.250825
OTU-82	NZPYR522-20	MTD 9143	0	0	Crambinae	Orocrambus harpophorus	Cobb Dam road	BOLD:AEC1456	1	6.666667
OTU-83	NZPYR409-20	MTD 7635	0.32051283	0.32051283	Crambinae	Orocrambus ordishi	Peel Forest Lake Pukaki	BOLD:AEB7872	2	1.9900497
OTU-83	NZPYR440-20	MTD 7867	0.32051283	0.32051283	Crambinae	Orocrambus ordishi	Peel Forest Lake Pukaki	BOLD:AEB7872	2	1.9900497
OTU-84	NZPYR105-20	MTD 6613	0	0	Crambinae	Orocrambus ordishi	Peel Forest Lake Pukaki	BOLD:AEB8883	1	1.9900497
OTU-85	NZPYR104-20	MTD 6612	0	0	Crambinae	Orocrambus vitellus	Peel Forest Lake Pukaki	BOLD:ACP6432	1	1.6339871
